# Supplementary material for: Unexpectedly, Creation of Temporary Water Bodies Has Increased the Availability of Food and Nesting Sites for Bees (Apiformes)
Source: MDPI journal article supplement (doi:10.3390/f13091410), 2022-09-02
Supplement: s1 [file s1]

**Table S1.** List of Apiformes found in the study sites (habitat types: A = forests; B = clearings; C = infiltration ditches; D = infiltration basins).

| No.        | Species                                       | Habitat types |    |     |     | N<br>= 4912 | %<br>of N | I    | II   | III   | IV     |
|------------|-----------------------------------------------|---------------|----|-----|-----|-------------|-----------|------|------|-------|--------|
|            |                                               | A             | B  | C   | D   |             |           |      |      |       |        |
| Colletidae |                                               |               |    |     |     |             |           |      |      |       |        |
| 1          | <i>Colletes cunicularius</i> (Linnaeus, 1761) | 1             | 4  | 23  | 106 | 134         | 2.7       | soil | poly | solit | medium |
| 2          | <i>Colletes daviesanus</i> Smith, 1846        | -             | 2  | 16  | 6   | 24          | 0.5       | soil | poly | solit | medium |
| 3          | <i>Colletes fodiens</i> (Fourcroy, 1785)      | -             | 90 | 332 | 171 | 593         | 12.1      | soil | poly | solit | medium |
| 4          | <i>Colletes marginatus</i> Smith, 1846        | -             | 7  | 1   | 4   | 12          | 0.2       | soil | poly | solit | medium |
| 5          | <i>Colletes similis</i> Schenck, 1853         | -             | 1  | 10  | 2   | 13          | 0.3       | soil | poly | solit | medium |
| 6          | <i>Hylaeus brevicornis</i> Nylander, 1852     | -             | 1  | 16  | 2   | 19          | 0.4       | cav  | poly | solit | small  |
| 7          | <i>Hylaeus communis</i> Nylander, 1852        | -             | 4  | 68  | 13  | 85          | 1.7       | cav  | poly | solit | small  |
| 8          | <i>Hylaeus difformis</i> (Eversmann, 1852)    | -             | -  | 1   | -   | 1           | <0.1      | cav  | poly | solit | small  |
| 9          | <i>Hylaeus dilatatus</i> (Kirby, 1802)        | -             | -  | 10  | 2   | 12          | 0.2       | cav  | poly | solit | small  |
| 10         | <i>Hylaeus gibbus</i> Saunders, 1850          | -             | 1  | 3   | 3   | 7           | 0.1       | cav  | poly | solit | small  |
| 11         | <i>Hylaeus gredleri</i> Förster, 1871         | -             | -  | 10  | -   | 10          | 0.2       | cav  | poly | solit | small  |
| 12         | <i>Hylaeus hyalinatus</i> Smith, 1842         | -             | -  | 2   | -   | 2           | <0.1      | cav  | poly | solit | small  |
| 13         | <i>Hylaeus styriacus</i> Förster, 1871        | -             | 1  | -   | 1   | 2           | <0.1      | cav  | poly | solit | small  |
| Andrenidae |                                               |               |    |     |     |             |           |      |      |       |        |
| 14         | <i>Andrena alfenella</i> Perkins, 1914        | -             | -  | -   | 1   | 1           | <0.1      | soil | poly | solit | small  |
| 15         | <i>Andrena apicata</i> Smith, 1847            | -             | -  | 1   | 4   | 5           | 0.1       | soil | oli  | solit | medium |
| 16         | <i>Andrena argentata</i> Smith, 1844          | -             | 1  | -   | -   | 1           | <0.1      | soil | poly | solit | medium |
| 17         | <i>Andrena barbilabris</i> (Kirby, 1802)      | 1             | 11 | 9   | 8   | 29          | 0.6       | soil | poly | solit | medium |
| 18         | <i>Andrena bicolor</i> Fabricius, 1775        | -             | -  | -   | 1   | 1           | <0.1      | soil | poly | solit | medium |
| 19         | <i>Andrena bimaculata</i> (Kirby, 1802)       | -             | 7  | 2   | 3   | 12          | 0.2       | soil | poly | solit | medium |
| 20         | <i>Andrena chrysosceles</i> (Kirby, 1802)     | -             | -  | 1   | 2   | 3           | 0.1       | soil | poly | solit | medium |
| 21         | <i>Andrena cineraria</i> (Linnaeus, 1758)     | 77            | 4  | 62  | 440 | 583         | 11.9      | soil | poly | solit | medium |
| 22         | <i>Andrena clarkella</i> (Kirby, 1802)        | -             | -  | 3   | 1   | 4           | 0.1       | soil | poly | solit | medium |
| 23         | <i>Andrena denticulata</i> (Kirby, 1802)      | -             | -  | 1   | -   | 1           | <0.1      | soil | oli  | solit | medium |

| No.               | Species                                       | Habitat types |    |    |     | N<br>= 4912 | %<br>of N | I    | II   | III   | IV     |
|-------------------|-----------------------------------------------|---------------|----|----|-----|-------------|-----------|------|------|-------|--------|
|                   |                                               | A             | B  | C  | D   |             |           |      |      |       |        |
| 24                | <i>Andrena dorsata</i> (Kirby, 1802)          | -             | -  | -  | 1   | 1           | <0.1      | soil | poly | solit | medium |
| 25                | <i>Andrena falsifica</i> Perkins, 1915        | -             | 1  | 3  | 1   | 5           | 0.1       | soil | poly | solit | medium |
| 26                | <i>Andrena flavipes</i> Panzer, 1799          | -             | -  | -  | 19  | 19          | 0.4       | soil | poly | solit | medium |
| 27                | <i>Andrena fucata</i> Smith, 1847             | -             | 1  | 1  | 1   | 3           | 0.1       | soil | poly | solit | medium |
| 28                | <i>Andrena fulva</i> (Müller, 1766)           | 1             | -  | 5  | 55  | 61          | 1.2       | soil | poly | solit | medium |
| 29                | <i>Andrena fulvago</i> (Christ, 1791)         | -             | 1  | 1  | -   | 2           | <0.1      | soil | oli  | solit | medium |
| 30                | <i>Andrena gravida</i> Imhoff, 1832           | -             | -  | -  | 1   | 1           | <0.1      | soil | poly | solit | medium |
| 31                | <i>Andrena haemorrhoa</i> (Fabricius, 1781)   | 12            | -  | 47 | 57  | 116         | 2.4       | soil | poly | solit | medium |
| 32                | <i>Andrena hattorfiana</i> (Fabricius, 1775)  | -             | 1  | -  | -   | 1           | <0.1      | soil | oli  | solit | medium |
| 33                | <i>Andrena helvola</i> (Linnaeus, 1758)       | 4             | -  | 13 | 25  | 42          | 0.9       | soil | poly | solit | medium |
| 34                | <i>Andrena humilis</i> Imhoff, 1832           | -             | -  | 4  | 1   | 5           | 0.1       | soil | oli  | solit | medium |
| 35                | <i>Andrena lapponica</i> Zetterstedt, 1838    | -             | -  | 15 | 5   | 20          | 0.4       | soil | poly | solit | medium |
| 36                | <i>Andrena minutula</i> (Kirby, 1802)         | 4             | -  | 2  | 51  | 57          | 1.2       | soil | poly | solit | small  |
| 37                | <i>Andrena minutuloides</i> Perkins, 1914     | -             | -  | -  | 1   | 1           | <0.1      | soil | poly | solit | small  |
| 38                | <i>Andrena nigroaenea</i> (Kirby, 1802)       | 16            | 1  | 49 | 248 | 314         | 6.4       | soil | poly | solit | medium |
| 39                | <i>Andrena nitida</i> (Müller, 1776)          | -             | -  | -  | 1   | 1           | <0.1      | soil | poly | solit | medium |
| 40                | <i>Andrena niveata</i> Friese, 1887           | -             | -  | 1  | -   | 1           | <0.1      | soil | oli  | solit | small  |
| 41                | <i>Andrena praecox</i> (Scopoli, 1763)        | 2             | -  | 57 | 193 | 252         | 5.1       | soil | poly | solit | medium |
| 42                | <i>Andrena subopaca</i> Nylander, 1848        | 3             | 1  | 7  | 9   | 20          | 0.4       | soil | poly | solit | small  |
| 43                | <i>Andrena vaga</i> Panzer, 1799              | -             | -  | 6  | 47  | 53          | 1.1       | soil | oli  | solit | medium |
| 44                | <i>Andrena ventralis</i> Imhoff, 1832         | -             | -  | -  | 4   | 4           | 0.1       | soil | poly | solit | medium |
| <b>Halictidae</b> |                                               |               |    |    |     |             |           |      |      |       |        |
| 45                | <i>Halictus confusus</i> Smith, 1853          | -             | 2  | 13 | 4   | 19          | 0.4       | soil | poly | euso  | small  |
| 46                | <i>Halictus gavaricus</i> Pérez, 1903         | -             | -  | -  | 1   | 1           | <0.1      | soil | poly | euso  | small  |
| 47                | <i>Halictus rubicundus</i> (Christ, 1791)     | -             | 3  | 7  | 5   | 15          | 0.3       | soil | poly | euso  | medium |
| 48                | <i>Halictus semitectus</i> Morawitz, 1874     | -             | 3  | 13 | 3   | 19          | 0.4       | -    | poly | euso  | small  |
| 49                | <i>Halictus sexcinctus</i> (Fabricius, 1775)  | -             | 98 | 28 | 74  | 200         | 4.1       | soil | poly | solit | medium |
| 50                | <i>Halictus subauratus</i> (Rossi, 1792)      | -             | 11 | 27 | 4   | 42          | 0.9       | soil | poly | euso  | small  |
| 51                | <i>Halictus tumulorum</i> (Linnaeus, 1758)    | -             | -  | 8  | 3   | 11          | 0.2       | soil | poly | euso  | small  |
| 52                | <i>Lasioglossum albipes</i> (Fabricius, 1781) | -             | 7  | 6  | 1   | 14          | 0.3       | soil | poly | euso  | small  |

| No. | Species                                             | Habitat types |    |    |    | N<br>= 4912 | %<br>of N | I    | II   | III   | IV     |
|-----|-----------------------------------------------------|---------------|----|----|----|-------------|-----------|------|------|-------|--------|
|     |                                                     | A             | B  | C  | D  |             |           |      |      |       |        |
| 53  | <i>Lasioglossum brevicorne</i> (Schenck, 1868)      | -             | 9  | 7  | 3  | 19          | 0.4       | soil | oli  | euso  | small  |
| 54  | <i>Lasioglossum calceatum</i> (Scopoli, 1763)       | -             | 2  | 10 | 4  | 16          | 0.3       | soil | poly | euso  | medium |
| 55  | <i>Lasioglossum costulatum</i> (Kriechbaumer, 1873) | -             | -  | -  | 1  | 1           | <0.1      | soil | oli  | solit | medium |
| 56  | <i>Lasioglossum intermedium</i> (Schenck, 1868)     | -             | -  | 1  | -  | 1           | <0.1      | -    | -    | solit | small  |
| 57  | <i>Lasioglossum laevigatum</i> (Kirby, 1802)        | -             | -  | -  | 5  | 5           | 0.1       | soil | poly | solit | medium |
| 58  | <i>Lasioglossum laticeps</i> (Schenck, 1868)        | -             | 1  | 1  | 3  | 5           | 0.1       | soil | poly | euso  | small  |
| 59  | <i>Lasioglossum leucopus</i> (Kirby, 1802)          | -             | 2  | 4  | 3  | 9           | 0.2       | soil | poly | euso  | small  |
| 60  | <i>Lasioglossum leucozonium</i> (Schränk, 1781)     | -             | 23 | 9  | 4  | 36          | 0.7       | soil | poly | solit | medium |
| 61  | <i>Lasioglossum lucidulum</i> (Schenck, 1861)       | -             | 1  | 1  | 5  | 7           | 0.1       | soil | poly | solit | small  |
| 62  | <i>Lasioglossum malachurum</i> (Kirby, 1802)        | -             | -  | -  | 1  | 1           | <0.1      | soil | poly | euso  | medium |
| 63  | <i>Lasioglossum morio</i> (Fabricius, 1793)         | -             | -  | 1  | 1  | 2           | <0.1      | soil | poly | euso  | small  |
| 64  | <i>Lasioglossum parvulum</i> (Schenck, 1853)        | 2             | 1  | 5  | 9  | 17          | 0.4       | soil | poly | solit | small  |
| 65  | <i>Lasioglossum pauxillum</i> (Schenck, 1853)       | -             | -  | 6  | 3  | 9           | 0.2       | soil | poly | euso  | small  |
| 66  | <i>Lasioglossum punctatissimum</i> (Schenck, 1853)  | -             | -  | 5  | 4  | 9           | 0.2       | soil | poly | solit | small  |
| 67  | <i>Lasioglossum quadrinotatum</i> (Kirby, 1802)     | -             | -  | 4  | 1  | 5           | 0.1       | soil | poly | solit | medium |
| 68  | <i>Lasioglossum sabulosum</i> (Warncke, 1986)       | -             | 1  | -  | 1  | 2           | <0.1      | -    | -    | -     | -      |
| 69  | <i>Lasioglossum sexnotatum</i> (Kirby, 1802)        | -             | -  | 2  | 12 | 14          | 0.3       | soil | poly | solit | medium |
| 70  | <i>Lasioglossum sexstrigatum</i> (Schenck, 1868)    | 1             | 1  | 9  | 27 | 38          | 0.8       | soil | poly | solit | small  |
| 71  | <i>Lasioglossum villosulum</i> (Kirby, 1802)        | -             | 5  | 2  | 4  | 11          | 0.2       | soil | poly | solit | small  |
| 72  | <i>Lasioglossum xanthopus</i> (Kirby, 1802)         | -             | -  | -  | 1  | 1           | <0.1      | soil | poly | solit | medium |
| 73  | <i>Sphecodes albilabris</i> Fabricius, 1793         | -             | 27 | 44 | 79 | 150         | 3.1       | clep | clep | clep  | medium |
| 74  | <i>Sphecodes crassus</i> Thomson, 1870              | -             | -  | 12 | 3  | 15          | 0.3       | clep | clep | clep  | small  |
| 75  | <i>Sphecodes croaticus</i> Meyer, 1922              | -             | -  | 1  | 1  | 2           | <0.1      | clep | clep | clep  | small  |
| 76  | <i>Sphecodes ephippius</i> Linnaeus, 1767           | 1             | 4  | 9  | 13 | 27          | 0.6       | clep | clep | clep  | small  |
| 77  | <i>Sphecodes geofrellus</i> Kirby, 1802             | -             | -  | 1  | -  | 1           | <0.1      | clep | clep | clep  | small  |
| 78  | <i>Sphecodes gibbus</i> Linnaeus, 1758              | -             | 4  | 3  | 3  | 10          | 0.2       | clep | clep | clep  | medium |
| 79  | <i>Sphecodes longulus</i> Hagens, 1882              | -             | -  | 2  | -  | 2           | <0.1      | clep | clep | clep  | small  |
| 80  | <i>Sphecodes marginatus</i> Hagens, 1882            | -             | 3  | 5  | 7  | 15          | 0.3       | clep | clep | clep  | small  |
| 81  | <i>Sphecodes miniatus</i> Hagens, 1882              | -             | -  | 7  | 4  | 11          | 0.2       | clep | clep | clep  | small  |
| 82  | <i>Sphecodes monilicornis</i> Kirby, 1802           | -             | 3  | 12 | 6  | 21          | 0.4       | clep | clep | clep  | medium |

| No.                 | Species                                                        | Habitat types |    |    |    | N<br>= 4912 | %<br>of N | I    | II   | III   | IV     |
|---------------------|----------------------------------------------------------------|---------------|----|----|----|-------------|-----------|------|------|-------|--------|
|                     |                                                                | A             | B  | C  | D  |             |           |      |      |       |        |
| 83                  | <i>Sphecodes pellucidus</i> Smith, 1845                        | -             | 4  | 5  | 16 | 25          | 0.5       | clep | clep | clep  | medium |
| 84                  | <i>Sphecodes reticulatus</i> Thomson, 1870                     | -             | -  | 10 | 6  | 16          | 0.3       | clep | clep | clep  | medium |
| <b>Melittidae</b>   |                                                                |               |    |    |    |             |           |      |      |       |        |
| 85                  | <i>Dasypoda hirtipes</i> (Fabricius, 1793)                     | -             | 1  | 1  | 13 | 15          | 0.3       | soil | oli  | solit | medium |
| 86                  | <i>Melitta leporina</i> (Panzer, 1799)                         | -             | 6  | -  | 2  | 8           | 0.2       | soil | oli  | solit | medium |
| <b>Megachilidae</b> |                                                                |               |    |    |    |             |           |      |      |       |        |
| 87                  | <i>Anthidiellum strigatum</i> Panzer, 1805                     | -             | 7  | 6  | 3  | 16          | 0.3       | cav  | oli  | solit | small  |
| 88                  | <i>Anthidium manicatum</i> Linnaeus, 1758                      | -             | 1  | -  | 2  | 3           | 0.1       | cav  | poly | solit | medium |
| 89                  | <i>Anthidium oblongatum</i> Illiger, 1806                      | -             | -  | 1  | 10 | 11          | 0.2       | cav  | poly | solit | medium |
| 90                  | <i>Chelostoma florisomne</i> Linnaeus, 1758                    | -             | -  | 1  | -  | 1           | <0.1      | cav  | oli  | solit | medium |
| 91                  | <i>Coelioxys conoidea</i> Illiger, 1806                        | -             | -  | 1  | 1  | 2           | <0.1      | clep | clep | clep  | medium |
| 92                  | <i>Coelioxys elongata</i> Lepeletier, 1841                     | -             | -  | 2  | -  | 2           | <0.1      | clep | clep | clep  | medium |
| 93                  | <i>Coelioxys mandibularis</i> Nylander, 1848                   | -             | 1  | 3  | 1  | 5           | 0.1       | clep | clep | clep  | medium |
| 94                  | <i>Coelioxys quadridentata</i> Linnaeus, 1758                  | -             | -  | -  | 5  | 5           | 0.1       | clep | clep | clep  | medium |
| 95                  | <i>Coelioxys rufescens</i> Lepeletier & Audinet-Serville, 1825 | -             | -  | -  | 1  | 1           | <0.1      | clep | clep | clep  | medium |
| 96                  | <i>Heriades crenulata</i> Nylander, 1856                       | -             | 3  | 1  | -  | 4           | 0.1       | cav  | oli  | solit | small  |
| 97                  | <i>Heriades truncorum</i> Linnaeus, 1758                       | -             | 5  | 95 | 8  | 108         | 2.2       | cav  | oli  | solit | small  |
| 98                  | <i>Hoplitis adunca</i> Panzer, 1798                            | -             | 1  | 2  | 2  | 5           | 0.1       | cav  | oli  | solit | medium |
| 99                  | <i>Hoplitis leucomelana</i> Kirby, 1802                        | -             | 1  | -  | 1  | 2           | <0.1      | cav  | poly | solit | small  |
| 100                 | <i>Megachile circumcincta</i> Kirby, 1802                      | -             | 1  | -  | 11 | 12          | 0.2       | soil | poly | solit | medium |
| 101                 | <i>Megachile ericetorum</i> Lepeletier, 1841                   | -             | -  | -  | 3  | 3           | 0.1       | hiv  | oli  | solit | medium |
| 102                 | <i>Megachile leachella</i> Curtis, 1828                        | -             | 2  | -  | -  | 2           | <0.1      | soil | poly | solit | medium |
| 103                 | <i>Megachile ligniseca</i> Kirby, 1802                         | -             | 6  | 9  | 4  | 19          | 0.4       | soil | poly | solit | medium |
| 104                 | <i>Megachile maritima</i> Kirby, 1802                          | -             | 10 | 4  | 25 | 39          | 0.8       | soil | poly | solit | medium |
| 105                 | <i>Megachile rotundata</i> Fabricius, 1793                     | -             | 4  | -  | -  | 4           | 0.1       | hiv  | poly | solit | medium |
| 106                 | <i>Megachile versicolor</i> Smith, 1844                        | -             | 3  | 11 | 6  | 20          | 0.4       | hiv  | poly | solit | medium |
| 107                 | <i>Megachile willughbiella</i> Kirby, 1802                     | -             | -  | -  | 2  | 2           | <0.1      | cav  | poly | solit | medium |
| 108                 | <i>Osmia aurulenta</i> Panzer, 1799                            | -             | 3  | 48 | 5  | 56          | 1.1       | cav  | poly | solit | medium |
| 109                 | <i>Osmia bicolor</i> Schrank, 1781                             | -             | -  | 5  | 5  | 10          | 0.2       | cav  | poly | solit | medium |

| No.           | Species                                                                                                                                    | Habitat types |     |    |     | N<br>= 4912 | %<br>of N | I    | II   | III   | IV     |
|---------------|--------------------------------------------------------------------------------------------------------------------------------------------|---------------|-----|----|-----|-------------|-----------|------|------|-------|--------|
|               |                                                                                                                                            | A             | B   | C  | D   |             |           |      |      |       |        |
| 110           | <i>Osmia bicornis</i> Linnaeus, 1758                                                                                                       | 1             | 3   | 19 | 3   | 26          | 0.5       | cav  | poly | solit | medium |
| 111           | <i>Osmia brevicornis</i> Fabricius, 1798                                                                                                   | -             | 1   | -  | 1   | 2           | <0.1      | cav  | oli  | solit | medium |
| 112           | <i>Osmia caerulescens</i> Linnaeus, 1758                                                                                                   | -             | 3   | -  | 1   | 4           | 0.1       | cav  | poly | solit | medium |
| 113           | <i>Osmia leaiana</i> Kirby, 1802                                                                                                           | -             | -   | -  | 3   | 3           | 0.1       | cav  | oli  | solit | medium |
| 114           | <i>Osmia uncinata</i> Gerstäcker, 1869                                                                                                     | -             | 1   | -  | -   | 1           | <0.1      | cav  | poly | solit | small  |
| 115           | <i>Stelis breviscula</i> Nylander, 1848                                                                                                    | -             | -   | -  | 3   | 3           | 0.1       | clep | clep | clep  | small  |
| 116           | <i>Stelis punctulatissima</i> Kirby, 1802                                                                                                  | -             | 1   | -  | -   | 1           | <0.1      | clep | clep | clep  | medium |
| 117           | <i>Stelis signata</i> Latreille, 1809                                                                                                      | -             | -   | 2  | -   | 2           | <0.1      | clep | clep | clep  | small  |
| <b>Apidae</b> |                                                                                                                                            |               |     |    |     |             |           |      |      |       |        |
| 118           | <i>Anthophora bimaculata</i> Panzer, 1798                                                                                                  | -             | 17  | 5  | 4   | 26          | 0.5       | soil | poly | solit | medium |
| 119           | <i>Anthophora furcata</i> Panzer, 1798                                                                                                     | -             | -   | -  | 1   | 1           | <0.1      | soil | oli  | solit | medium |
| 120           | <i>Anthophora plumipes</i> Pallas, 1772                                                                                                    | -             | -   | -  | 1   | 1           | <0.1      | soil | poly | solit | medium |
| 121           | <i>Apis mellifera</i> Linnaeus, 1758                                                                                                       | 1             | 3   | 4  | 22  | 30          | 0.6       | hiv  | poly | euso  | medium |
| 122           | <i>Bombus bohemicus</i> Seidl, 1838                                                                                                        | -             | 17  | 14 | 11  | 42          | 0.9       | clep | clep | clep  | medium |
| 123           | <i>Bombus campestris</i> Panzer, 1801                                                                                                      | -             | 1   | -  | -   | 1           | <0.1      | clep | clep | clep  | medium |
| 124           | <i>Bombus cryptarum</i> Fabricius, 1775/ <i>lucorum</i><br>Linnaeus, 1761/ <i>terrestris</i> Linnaeus, 1758<br>( <i>Terrestri bombus</i> ) | 2             | 152 | 71 | 169 | 394         | 8.0       | hiv  | poly | euso  | large  |
| 125           | <i>Bombus hortorum</i> Linnaeus, 1761                                                                                                      | -             | 9   | 1  | -   | 10          | 0.2       | hiv  | poly | euso  | large  |
| 126           | <i>Bombus hypnorum</i> Linnaeus, 1758                                                                                                      | -             | 17  | 5  | 21  | 43          | 0.9       | hiv  | poly | euso  | large  |
| 127           | <i>Bombus lapidarius</i> Linnaeus, 1758                                                                                                    | 3             | 17  | 2  | 14  | 36          | 0.7       | hiv  | poly | euso  | large  |
| 128           | <i>Bombus pascuorum</i> Scopoli, 1763                                                                                                      | 2             | 97  | 41 | 61  | 201         | 4.1       | hiv  | poly | euso  | medium |
| 129           | <i>Bombus pratorum</i> Linnaeus, 1761                                                                                                      | 5             | 50  | 50 | 72  | 177         | 3.6       | hiv  | poly | euso  | medium |
| 130           | <i>Bombus ruderarius</i> Müller, 1776                                                                                                      | -             | -   | -  | 1   | 1           | <0.1      | hiv  | poly | euso  | medium |
| 131           | <i>Bombus rupestris</i> Fabricius, 1793                                                                                                    | -             | 4   | 2  | -   | 6           | 0.1       | clep | clep | clep  | medium |
| 132           | <i>Bombus sylvarum</i> Linnaeus, 1761                                                                                                      | 1             | -   | -  | -   | 1           | <0.1      | hiv  | poly | euso  | medium |
| 133           | <i>Bombus sylvestris</i> Lepeletier, 1832                                                                                                  | -             | 4   | 2  | 1   | 7           | 0.1       | clep | clep | clep  | medium |
| 134           | <i>Bombus vestalis</i> Geoffroy, 1785                                                                                                      | -             | 9   | 10 | 5   | 24          | 0.5       | clep | clep | clep  | medium |
| 135           | <i>Ceratina cyanea</i> Kirby, 1802                                                                                                         | -             | -   | 1  | 4   | 5           | 0.1       | cav  | poly | solit | small  |
| 136           | <i>Epeolus cruciger</i> Panzer, 1799                                                                                                       | -             | -   | 4  | 1   | 5           | 0.1       | clep | clep | clep  | small  |

| No. | Species                                          | Habitat types |    |    |    | N<br>= 4912 | %<br>of N | I    | II   | III  | IV     |
|-----|--------------------------------------------------|---------------|----|----|----|-------------|-----------|------|------|------|--------|
|     |                                                  | A             | B  | C  | D  |             |           |      |      |      |        |
| 137 | <i>Epeolus variegatus</i> Linnaeus, 1758         | -             | 1  | 27 | -  | 28          | 0.6       | clep | clep | clep | medium |
| 138 | <i>Melecta albifrons</i> Forster, 1771           | -             | -  | 2  | -  | 2           | <0.1      | clep | clep | clep | medium |
| 139 | <i>Nomada alboguttata</i> Herrich-Schäffer, 1839 | -             | 1  | 2  | 1  | 4           | 0.1       | clep | clep | clep | medium |
| 140 | <i>Nomada bifasciata</i> Olivier, 1811           | -             | 1  | -  | 4  | 5           | 0.1       | clep | clep | clep | medium |
| 141 | <i>Nomada ferruginata</i> Linnaeus, 1767         | 2             | -  | 1  | 5  | 8           | 0.2       | clep | clep | clep | medium |
| 142 | <i>Nomada flavoguttata</i> Kirby, 1802           | -             | -  | 2  | 3  | 5           | 0.1       | clep | clep | clep | small  |
| 143 | <i>Nomada fucata</i> Panzer, 1798                | -             | -  | -  | 2  | 2           | <0.1      | clep | clep | clep | medium |
| 144 | <i>Nomada goodeniana</i> Kirby, 1802             | -             | 4  | -  | 2  | 6           | 0.1       | clep | clep | clep | medium |
| 145 | <i>Nomada lathburiana</i> Kirby, 1802            | -             | 21 | 6  | 17 | 44          | 0.9       | clep | clep | clep | medium |
| 146 | <i>Nomada leucopthalma</i> Kirby, 1802           | -             | -  | -  | 8  | 8           | 0.2       | clep | clep | clep | medium |
| 147 | <i>Nomada moeschleri</i> Alfken, 1913            | 1             | 4  | 4  | 2  | 11          | 0.2       | clep | clep | clep | medium |
| 148 | <i>Nomada opaca</i> Alfken, 1913                 | -             | -  | 1  | -  | 1           | <0.1      | clep | clep | clep | small  |
| 149 | <i>Nomada panzeri</i> Lepeletier, 1841           | -             | -  | 3  | 4  | 7           | 0.1       | clep | clep | clep | medium |
| 150 | <i>Nomada ruficornis</i> Linnaeus, 1758          | -             | -  | 3  | 4  | 7           | 0.1       | clep | clep | clep | medium |
| 151 | <i>Nomada sheppardana</i> Kirby, 1802            | -             | -  | 1  | 2  | 3           | 0.1       | clep | clep | clep | small  |
| 152 | <i>Nomada signata</i> Jurine, 1807               | -             | -  | 2  | 4  | 6           | 0.1       | clep | clep | clep | medium |

**Functional characteristics:** I = nest substrate (soil = soil, cav = cavity, hiv = hive, clep = cleptoparasitic); II = floral specificity (oli = oligolectic, poly = polylectic);

III = social behavior (solit = solitary, euso = eusocial, clep = cleptoparasitic); IV = body size (small < 8 mm, medium 8-15 mm, large > 15 mm).
