# Supplementary material for: Unexpectedly, Creation of Temporary Water Bodies Has Increased the Availability of Food and Nesting Sites for Bees (Apiformes)
Source: MDPI journal article supplement (doi:10.3390/f13091410), 2022-09-02
Supplement: s1 [file s1]

**Table S2.** List of plant species found in in the study sites (habitat types: A = forests; B = clearings; C = infiltration ditches; D = infiltration basins).

| Family          | Species                       | Habitat types |   |   |   | L | F | Lf | Ghg | Fp  |
|-----------------|-------------------------------|---------------|---|---|---|---|---|----|-----|-----|
|                 |                               | A             | B | C | D |   |   |    |     |     |
| Aceraceae       | <i>Acer negundo</i>           |               | + | + | + | 5 | 6 | M  | K   | N+P |
| Aceraceae       | <i>Acer platanoides</i>       |               | + |   | + | 4 | x | M  | Sp  | N+P |
| Aceraceae       | <i>Acer pseudoplatanus</i>    |               | + |   |   | 4 | 6 | M  | Sp  | N+P |
| Asteraceae      | <i>Achillea millefolium</i>   | +             | + | + | + | 8 | 4 | H  | Ap  | N+P |
| Asteraceae      | <i>Achillea pannonica</i>     |               | + |   |   | 7 | 3 | H  | Ap  | N+P |
| Apiaceae        | <i>Aegopodium podagraria</i>  |               | + |   |   | 5 | 6 | GH | Ap  | N+P |
| Rosaceae        | <i>Agrimonia eupatoria</i>    |               |   |   | + | 7 | 4 | H  | Sp  | N+P |
| Poaceae         | <i>Agrostis capillaris</i>    | +             | + | + | + | 7 | x | H  | Ap  | -   |
| Poaceae         | <i>Agrostis gigantea</i>      |               | + | + | + | 7 | 6 | H  | Ap  | -   |
| Poaceae         | <i>Agrostis stolonifera</i>   |               |   |   | + | 7 | 7 | H  | Ap  | -   |
| Lamiaceae       | <i>Ajuga reptans</i>          |               | + | + | + | 6 | 6 | H  | Sp  | N   |
| Brassicaceae    | <i>Alliaria petiolata</i>     |               | + | + |   | 5 | 5 | H  | Ap  | N+P |
| Betulaceae      | <i>Alnus glutinosa</i>        |               | + |   |   | 5 | 9 | M  | Sp  | -   |
| Poaceae         | <i>Alopecurus aequalis</i>    |               |   | + |   | 9 | 9 | HT | Sp  | -   |
| Rosaceae        | <i>Amelanchier spicata</i>    | +             | + |   | + | 7 | 3 | N  | K   | -   |
| Asteraceae      | <i>Anthemis ruthenica</i>     |               |   |   |   | 9 | 3 | T  | K   | -   |
| Anthericaceae   | <i>Anthericum ramosum</i>     | +             |   |   |   | 7 | 3 | G  | Sp  | P   |
| Poaceae         | <i>Anthoxanthum odoratum</i>  | +             | + | + | + | x | x | H  | Ap  | -   |
| Apiaceae        | <i>Anthriscus sylvestris</i>  |               | + |   |   | 7 | 5 | H  | Ap  | N+P |
| Poaceae         | <i>Apera spica-venti</i>      |               | + |   | + | 6 | 6 | T  | Ar  | -   |
| Caryophyllaceae | <i>Arenaria serpyllifolia</i> |               | + | + | + | 8 | 4 | T  | Ap  | N+P |
| Poaceae         | <i>Arrhenatherum elatius</i>  | +             | + | + | + | 8 | x | H  | Ap  | -   |
| Asteraceae      | <i>Artemisia campestris</i>   |               | + | + | + | 9 | 2 | Ch | Ap  | P   |
| Asteraceae      | <i>Artemisia vulgaris</i>     |               | + |   | + | 7 | 6 | C  | Ap  | P   |

| Family          | Species                           | Habitat types |   |   |   | L | F | Lf    | Ghg | Fp  |
|-----------------|-----------------------------------|---------------|---|---|---|---|---|-------|-----|-----|
|                 |                                   | A             | B | C | D |   |   |       |     |     |
| Fabaceae        | <i>Astragalus arenarius</i>       |               | + |   | + | 7 | 2 | H     | Sp  | -   |
| Berberidaceae   | <i>Berberis vulgaris</i>          |               |   |   | + | 7 | 4 | N     | Sp  | N   |
| Brassicaceae    | <i>Berteroa incana</i>            |               | + | + | + | 9 | 3 | TH    | Ar  | N+P |
| Betulaceae      | <i>Betula pendula (b+c)</i>       | +             | + | + | + | 7 | x | M     | Sp  | -   |
| Asteraceae      | <i>Bidens frondosa</i>            |               |   | + | + | 7 | 8 | T     | K   | P   |
| Poaceae         | <i>Bromus tectorum</i>            |               | + | + | + | 8 | 3 | T     | Ar  | -   |
| Poaceae         | <i>Calamagrostis epigejos</i>     |               | + | + | + | 7 | x | G     | Ap  | -   |
| Ericaceae       | <i>Calluna vulgaris</i>           | +             | + | + | + | 8 | x | Ch    | Sp  | N+P |
| Convolvulaceae  | <i>Calystegia sepium</i>          |               |   |   | + | 8 | 6 | H     | Sp  | N   |
| Brassicaceae    | <i>Capsella bursa-pastoris</i>    |               | + | + | + | 7 | 5 | TH    | Ar  | N+P |
| Brassicaceae    | <i>Cardaminopsis arenosa</i>      |               | + | + | + | 9 | 4 | HT    | Ap  | N+P |
| Asteraceae      | <i>Carduus crispus</i>            |               |   | + | + | 7 | 6 | H     | Sp  | N+P |
| Cyperaceae      | <i>Carex acutiformis</i>          |               |   | + |   | 7 | 9 | GHy   | Sp  | -   |
| Cyperaceae      | <i>Carex hirta</i>                | +             | + | + | + | 7 | 6 | G     | Ap  | -   |
| Cyperaceae      | <i>Carex ovalis</i>               |               | + | + | + | 7 | 7 | H     | Sp  | -   |
| Cyperaceae      | <i>Carex pilulifera</i>           |               | + | + |   | 5 | 5 | H     | Sp  | -   |
| Cyperaceae      | <i>Carex pseudocyperus</i>        |               |   |   | + | 7 | 9 | HyH   | Sp  | -   |
| Cyperaceae      | <i>Carex vulpina</i>              |               | + |   | + | 9 | 8 | H(G)  | Sp  | -   |
| Asteraceae      | <i>Centaurea cyanus</i>           |               | + |   |   | 7 | x | T     | Ar  | N+P |
| Asteraceae      | <i>Centaurea stoebe</i>           |               | + | + | + | 9 | 3 | H     | Ap  | N+P |
| Caryophyllaceae | <i>Cerastium holosteoides</i>     |               |   | + | + | 6 | 5 | Ch(T) | Ap  | N+P |
| Caryophyllaceae | <i>Cerastium semidecandrum</i>    |               |   |   | + | 8 | 3 | T(H)  | Ap  | -   |
| Onagraceae      | <i>Chamaenerion angustifolium</i> |               | + | + | + | 8 | 5 | H     | Ap  | N+P |
| Asteraceae      | <i>Chamomilla recutita</i>        |               |   |   |   | 7 | 5 | T     | Ar  | N+P |
| Papaveraceae    | <i>Chelidonium majus</i>          |               |   |   |   | 6 | 5 | H     | Ap  | P   |

| Family          | Species                         | Habitat types |   |   |   | L | F | Lf   | Ghg | Fp  |
|-----------------|---------------------------------|---------------|---|---|---|---|---|------|-----|-----|
|                 |                                 | A             | B | C | D |   |   |      |     |     |
| Chenopodiaceae  | <i>Chenopodium album</i>        |               | + | + | + | x | 7 | T    | Ap  | P   |
| Asteraceae      | <i>Chondrilla juncea</i>        |               | + | + |   | 8 | 3 | H    | Ap  | N+P |
| Asteraceae      | <i>Cichorium intybus</i>        |               | + |   |   | 9 | 4 | H    | Ar  | N+P |
| Asteraceae      | <i>Cirsium arvense</i>          |               | + | + | + | 8 | x | G    | Ap  | N+P |
| Asteraceae      | <i>Cirsium vulgare</i>          |               | + | + | + | 8 | 5 | H    | Ap  | N+P |
| Lamiaceae       | <i>Clinopodium vulgare</i>      | +             |   |   |   | 7 | 4 | H    | Sp  | N   |
| Ranunculaceae   | <i>Consolida regalis</i>        |               | + |   | + | 6 | 4 | T    | Ar  | N+P |
| Convallariaceae | <i>Convallaria majalis</i>      | +             |   |   | + | 5 | 4 | G    | Sp  | N+P |
| Convolvulaceae  | <i>Convolvulus arvensis</i>     |               | + | + | + | 7 | 4 | H(G) | Ap  | N+P |
| Asteraceae      | <i>Conyza canadensis</i>        |               | + | + | + | 8 | 4 | TH   | K   | N+P |
| Chenopodiaceae  | <i>Corispermum leptopterum</i>  |               |   |   |   | 8 | 3 | T    | K   | -   |
| Cornaceae       | <i>Cornus sanguinea</i>         |               | + |   |   | 7 | 5 | N    | Sp  | N   |
| Fabaceae        | <i>Coronilla varia</i>          |               | + |   | + | 7 | 4 | H    | Sp  | N+P |
| Corylaceae      | <i>Corylus avellana</i>         | +             |   |   |   | 6 | x | NM   | Sp  | P   |
| Poaceae         | <i>Corynephorus canescens</i>   |               | + | + | + | 8 | 2 | H    | Ap  | -   |
| Rosaceae        | <i>Crataegus monogyna (b+c)</i> | +             | + |   | + | 7 | 4 | N/M  | Ap  | N+P |
| Asteraceae      | <i>Crepis capillaris</i>        |               | + | + | + | 7 | 5 | HT   | Ap  | -   |
| Asteraceae      | <i>Crepis paludosa</i>          |               | + |   |   | 7 | 8 | H    | Sp  | -   |
| Poaceae         | <i>Dactylis glomerata</i>       |               | + |   |   | 7 | 5 | H    | Ap  | -   |
| Poaceae         | <i>Danthonia decumbens</i>      |               | + |   |   | 8 | x | H    | Ap  | -   |
| Apiaceae        | <i>Daucus carota</i>            |               | + |   |   | 8 | 4 | H    | Ap  | N+P |
| Poaceae         | <i>Deschampsia caespitosa</i>   |               |   |   | + | 6 | 7 | H    | Ap  | -   |
| Poaceae         | <i>Deschampsia flexuosa</i>     | +             | + | + | + | 6 | x | H    | Sp  | -   |
| Brassicaceae    | <i>Descurainia sophia</i>       |               |   |   | + | 8 | 4 | T    | Ar  | -   |
| Dryopteridaceae | <i>Dryopteris carthusiana</i>   | +             |   |   |   | 5 | x | H    | Sp  | -   |

| Family          | Species                        | Habitat types |   |   |   | L | F | Lf   | Ghg | Fp  |
|-----------------|--------------------------------|---------------|---|---|---|---|---|------|-----|-----|
|                 |                                | A             | B | C | D |   |   |      |     |     |
| Dryopteridaceae | <i>Dryopteris filix-mas</i>    |               |   | + |   | 3 | 5 | H    | Sp  | -   |
| Poaceae         | <i>Echinochloa crus-galli</i>  |               |   |   | + | 6 | 5 | T    | Ar  | -   |
| Boraginaceae    | <i>Echium vulgare</i>          |               | + | + | + | 9 | 4 | H    | Ar  | N+P |
| Poaceae         | <i>Elymus caninus</i>          |               |   |   |   | 6 | 6 | H    | Sp  | -   |
| Poaceae         | <i>Elymus repens</i>           |               | + | + | + | 7 | x | G    | Ap  | -   |
| Onagraceae      | <i>Epilobium parviflorum</i>   |               |   |   | + | 7 | 9 | H    | Sp  | -   |
| Equisetaceae    | <i>Equisetum arvense</i>       |               | + |   | + | 6 | x | G    | Ap  | -   |
| Equisetaceae    | <i>Equisetum palustre</i>      |               |   |   | + | 7 | 8 | G    | Ap  | -   |
| Asteraceae      | <i>Erigeron acris</i>          |               |   |   |   | 9 | 4 | H(T) | Sp  | -   |
| Asteraceae      | <i>Erigeron annuus</i>         |               |   |   | + | 7 | 6 | H    | K   | N+P |
| Geraniaceae     | <i>Erodium cicutarium</i>      |               |   |   | + | 8 | 4 | T    | Ar  | N+P |
| Brassicaceae    | <i>Erysimum cheiranthoides</i> |               |   | + | + | 7 | 5 | T    | Ar  | -   |
| Asteraceae      | <i>Eupatorium cannabinum</i>   |               | + | + | + | 7 | 7 | H    | Sp  | N+P |
| Euphorbiaceae   | <i>Euphorbia cyparissias</i>   | +             | + | + | + | 8 | 3 | H    | Ap  | N+P |
| Fagaceae        | <i>Fagus sylvatica</i>         | +             |   |   |   | 3 | 5 | M    | Sp  | -   |
| Polygonaceae    | <i>Fallopia convolvulus</i>    | +             | + |   |   | 7 | 5 | T    | Ar  | N+P |
| Polygonaceae    | <i>Fallopia dumetorum</i>      | +             | + | + | + | 6 | 5 | T    | Sp  | N+P |
| Poaceae         | <i>Festuca pratensis</i>       |               | + |   | + | 8 | 6 | H    | Ap  | -   |
| Poaceae         | <i>Festuca rubra</i>           |               |   |   | + | x | 6 | H    | Ap  | -   |
| Poaceae         | <i>Festuca trachyphylla</i>    |               | + | + | + | 8 | 3 | H    | Ap  | -   |
| Asteraceae      | <i>Filago arvensis</i>         |               | + | + | + | 8 | 3 | T    | Ap  | -   |
| Rosaceae        | <i>Fragaria vesca</i>          | +             | + | + | + | 7 | 5 | H    | Sp  | N+P |
| Rosaceae        | <i>Fragaria viridis</i>        |               | + | + | + | 7 | 3 | H    | Sp  | N+P |
| Rosaceae        | <i>Fragaria x ananassa</i>     |               |   |   |   | 6 | 5 | H    | Ef  | N+P |
| Rhamnaceae      | <i>Frangula alnus</i>          | +             | + |   | + | 6 | 8 | N    | Sp  | N+P |
| Lamiaceae       | <i>Galeopsis pubescens</i>     |               |   | + | + | 7 | 5 | T    | Ap  | N+P |
| Lamiaceae       | <i>Galeopsis tetrahit</i>      |               |   |   | + | 7 | 5 | T    | Ap  | N+P |
| Rubiaceae       | <i>Galium aparine</i>          |               |   | + | + | 7 | x | T    | Ap  | N+P |
| Rubiaceae       | <i>Galium boreale</i>          |               | + |   |   | 6 | 6 | H    | Ap  | -   |

| Family          | Species                      | Habitat types |   |   |   | L | F  | Lf   | Ghg | Fp  |
|-----------------|------------------------------|---------------|---|---|---|---|----|------|-----|-----|
|                 |                              | A             | B | C | D |   |    |      |     |     |
| Rubiaceae       | <i>Galium mollugo</i>        |               |   |   | + | 7 | 4  | H    | Ap  | N+P |
| Rubiaceae       | <i>Galium verum</i>          | +             | + |   |   | 7 | 4  | H    | Ap  | N+P |
| Fabaceae        | <i>Genista tinctoria</i>     |               |   |   |   | 8 | 6  | N/Ch | Sp  | P   |
| Geraniaceae     | <i>Geranium pusillum</i>     |               | + |   |   | 7 | 4  | T    | Ar  | N   |
| Geraniaceae     | <i>Geranium robertianum</i>  |               |   |   |   | 5 | x  | TH   | Sp  | N+P |
| Rosaceae        | <i>Geum urbanum</i>          |               | + |   |   | 4 | 5  | H    | Ap  | N+P |
| Lamiaceae       | <i>Glechoma hederacea</i>    |               | + |   |   | 6 | 6  | GH   | Ap  | N+P |
| Araliaceae      | <i>Hedera helix</i>          | +             |   |   |   | 4 | 5  | ChL  | Sp  | N+P |
| Asteraceae      | <i>Helianthus annuus</i>     |               | + |   |   | 7 | 6  | T    | Ef  | N+P |
| Asteraceae      | <i>Helichrysum arenarium</i> |               | + | + | + | 8 | 2  | H    | Ap  | P   |
| Caryophyllaceae | <i>Herniaria glabra</i>      |               | + |   | + | 8 | 3  | HT   | Ap  | -   |
| Asteraceae      | <i>Hieracium murorum</i>     |               | + |   |   | 4 | 5  | H    | Sp  | N+P |
| Asteraceae      | <i>Hieracium pilosella</i>   |               | + | + | + | 7 | 4  | H    | Ap  | N+P |
| Asteraceae      | <i>Hieracium umbellatum</i>  | +             | + |   |   | 6 | 4  | H    | Sp  | -   |
| Cannabaceae     | <i>Humulus lupulus</i>       |               |   | + |   | 7 | 8  | H    | Ap  | -   |
| Hypericaceae    | <i>Hypericum perforatum</i>  | +             | + | + | + | 7 | 4  | H    | Ap  | P   |
| Asteraceae      | <i>Hypochaeris radicata</i>  |               | + |   |   | 8 | 5  | H    | Ap  | -   |
| Balsaminaceae   | <i>Impatiens parviflora</i>  | +             | + | + | + | 4 | 5  | T    | K   | N+P |
| Campanulaceae   | <i>Jasione montana</i>       |               | + | + | + | 7 | 3  | H    | Ap  | N   |
| Juncaceae       | <i>Juncus effusus</i>        |               |   |   | + | 8 | 7  | H    | Ap  | -   |
| Cupressaceae    | <i>Juniperus communis</i>    |               | + |   | + | 8 | 4  | N/M  | Sp  | -   |
| Dipsacaceae     | <i>Knautia arvensis</i>      | +             | + |   | + | 7 | 4  | H    | Ap  | N+P |
| Asteraceae      | <i>Lactuca serriola</i>      |               | + | + | + | 9 | 4  | H    | Ar  | N+P |
| Asteraceae      | <i>Lapsana communis</i>      |               |   |   | + | 5 | 5  | TH   | Ap  | N+P |
| Lemnaceae       | <i>Lemna gibba</i>           |               |   |   | + | 8 | 11 | Hy   | Sp  | -   |
| Lemnaceae       | <i>Lemna minor</i>           |               |   | + | + | 7 | 11 | Hy   | Sp  | -   |
| Asteraceae      | <i>Leontodon autumnalis</i>  |               |   |   | + | 7 | 5  | H    | Ap  | N+P |
| Brassicaceae    | <i>Lepidium densiflorum</i>  |               | + | + | + | 8 | 4  | T(H) | K   | -   |

| Family           | Species                                             | Habitat types |   |   |   | L | F | Lf   | Ghg | Fp  |
|------------------|-----------------------------------------------------|---------------|---|---|---|---|---|------|-----|-----|
|                  |                                                     | A             | B | C | D |   |   |      |     |     |
| Brassicaceae     | <i>Lepidium ruderae</i>                             |               | + |   |   | 9 | 4 | T(H) | Ar  | -   |
| Scrophulariaceae | <i>Linaria vulgaris</i>                             |               | + |   | + | 8 | 4 | G    | Ap  | N+P |
| Fabaceae         | <i>Lotus corniculatus</i>                           |               | + |   | + | 7 | 4 | H    | Ap  | N+P |
| Juncaceae        | <i>Luzula pilosa</i>                                | +             | + |   | + | 2 | 5 | H    | Sp  | -   |
| Lycopodiaceae    | <i>Lycopodium annotinum</i>                         |               | + |   |   | 3 | 6 | C    | Sp  | -   |
| Lamiaceae        | <i>Lycopus europaeus</i>                            |               |   | + | + | 7 | 9 | HHy  | Sp  | N+P |
| Malvaceae        | <i>Malva alcea</i>                                  |               | + |   |   | 8 | 5 | H    | Ar  | N+P |
| Asteraceae       | <i>Matricaria maritima</i><br>subsp. <i>inodora</i> |               |   |   |   | 9 | 5 | T    | Ar  | -   |
| Fabaceae         | <i>Medicago lupulina</i>                            |               | + |   | + | 7 | 4 | TH   | Ap  | N+P |
| Fabaceae         | <i>Medicago sativa</i>                              |               | + |   |   | 8 | 4 | H    | K   | N+P |
| Scrophulariaceae | <i>Melampyrum pratense</i>                          | +             | + |   |   | 6 | 5 | pPT  | Sp  | N+P |
| Caryophyllaceae  | <i>Melandrium album</i>                             |               | + |   | + | 9 | 5 | T    | Ar  | -   |
| Poaceae          | <i>Melica nutans</i>                                |               | + |   |   | 4 | 4 | GH   | Sp  | -   |
| Fabaceae         | <i>Melilotus albus</i>                              |               | + |   |   | 9 | 3 | HT   | Ap  | N+P |
| Fabaceae         | <i>Melilotus officinalis</i>                        |               |   |   | + | 8 | 3 | H    | Ap  | N+P |
| Lamiaceae        | <i>Mentha aquatica</i>                              |               |   | + | + | 7 | 9 | HHy  | Sp  | -   |
| Asteraceae       | <i>Mycelis muralis</i>                              |               |   | + | + | 4 | 5 | H    | Sp  | P   |
| Boraginaceae     | <i>Myosotis palustris</i>                           |               |   |   |   | 7 | 8 | H    | Ap  | -   |
| Caryophyllaceae  | <i>Myosoton aquaticum</i>                           |               |   |   | + | 7 | 8 | HG   | Sp  | N+P |
| Onagraceae       | <i>Oenothera biennis</i>                            |               | + | + | + | 9 | 4 | H    | Ap  | N+P |
| Fabaceae         | <i>Ononis spinosa</i>                               |               | + |   |   | 8 | 4 | HN   | Ap  | N   |
| Rosaceae         | <i>Padus avium</i>                                  | +             | + | + | + | 5 | 8 | M/N  | Sp  | N+P |
| Rosaceae         | <i>Padus serotina</i>                               | +             | + | + |   | 6 | 5 | M(N) | K   | N+P |
| Papaveraceae     | <i>Papaver dubium</i>                               |               | + |   | + | 6 | 4 | T    | Ar  | P   |
| Vitaceae         | <i>Parthenocissus inserta</i>                       |               |   |   |   | 7 | 7 | L    | Ef  | P   |

| Family          | Species                                                       | Habitat types |   |   |   | L | F  | Lf  | Ghg | Fp  |
|-----------------|---------------------------------------------------------------|---------------|---|---|---|---|----|-----|-----|-----|
|                 |                                                               | A             | B | C | D |   |    |     |     |     |
| Vitaceae        | <i>Parthenocissus quinquefolia</i>                            |               | + |   |   | - | -  | L   | K   | P   |
| Caryophyllaceae | <i>Petrorhagia prolifera</i>                                  |               | + | + | + | 8 | 3  | T   | Ap  | -   |
| Apiaceae        | <i>Peucedanum oreoselinum</i>                                 | +             | + |   | + | 6 | 3  | H   | Sp  | N+P |
| Poaceae         | <i>Phalaris arundinacea</i>                                   |               | + | + | + | 7 | 8  | HyH | Sp  | -   |
| Poaceae         | <i>Phragmites australis</i>                                   |               |   | + | + | 7 | 10 | GHy | Sp  | -   |
| Asteraceae      | <i>Picris hieracioides</i>                                    |               | + |   | + | 8 | 4  | H   | Ap  | N+P |
| Apiaceae        | <i>Pimpinella saxifraga</i>                                   |               |   |   | + | 7 | 3  | H   | Sp  | N+P |
| Pinaceae        | <i>Pinus sylvestris</i>                                       | +             | + | + | + | 7 | x  | M   | Sp  | -   |
| Plantaginaceae  | <i>Plantago lanceolata</i>                                    |               | + |   |   | 6 | x  | H   | Ap  | P   |
| Plantaginaceae  | <i>Plantago major</i>                                         |               | + |   | + | 8 | 5  | H   | Ap  | P   |
| Poaceae         | <i>Poa annua</i>                                              |               |   |   | + | 7 | 6  | TH  | Ap  | -   |
| Poaceae         | <i>Poa compressa</i>                                          |               | + | + | + | 9 | 3  | H   | Ap  | -   |
| Poaceae         | <i>Poa palustris</i>                                          |               |   |   | + | 7 | 9  | H   | Ap  | -   |
| Poaceae         | <i>Poa pratensis</i>                                          |               | + |   | + | 6 | 5  | H   | Ap  | -   |
| Poaceae         | <i>Poa trivialis</i>                                          |               |   |   |   | 6 | 7  | H   | Ap  | -   |
| Convallariaceae | <i>Polygonatum odoratum</i>                                   | +             |   |   |   | 7 | 3  | G   | Sp  | N   |
| Polygonaceae    | <i>Polygonum aviculare</i>                                    |               |   | + | + | 7 | 4  | T   | Ap  | N+P |
| Polygonaceae    | <i>Polygonum hydropiper</i>                                   |               |   | + | + | 7 | 8  | T   | Ap  | N+P |
| Polygonaceae    | <i>Polygonum lapathifolium</i><br>subsp. <i>lapathifolium</i> |               |   | + | + | 6 | 8  | T   | Ap  | N+P |
| Polygonaceae    | <i>Polygonum persicaria</i>                                   |               | + | + | + | 6 | 5  | T   | Ap  | -   |
| Salicaceae      | <i>Populus alba</i>                                           |               | + | + | + | 5 | 7  | M   | Sp  | P   |
| Salicaceae      | <i>Populus tremula</i>                                        | +             | + |   | + | 6 | 5  | M   | Sp  | P   |
| Salicaceae      | <i>Populus x canadensis</i>                                   |               | + |   | + | - | -  | M   | K   | P   |
| Rosaceae        | <i>Potentilla alba</i>                                        | +             |   |   |   | 6 | 4  | H   | Sp  | -   |
| Rosaceae        | <i>Potentilla arenaria</i>                                    |               | + |   | + | 9 | 1  | H   | Sp  | -   |
| Rosaceae        | <i>Potentilla argentea</i>                                    |               | + | + | + | 9 | 2  | H   | Ap  | P   |
| Rosaceae        | <i>Potentilla reptans</i>                                     |               | + |   | + | 6 | 6  | H   | Ap  | P   |

| Family          | Species                                    | Habitat types |   |   |   | L | F | Lf   | Ghg | Fp  |
|-----------------|--------------------------------------------|---------------|---|---|---|---|---|------|-----|-----|
|                 |                                            | A             | B | C | D |   |   |      |     |     |
| Rosaceae        | <i>Prunus cerasifera</i><br>'Atropurpurea' |               |   |   |   | - | - | H    | K   | N   |
| Rosaceae        | <i>Prunus spinosa</i>                      |               | + |   | + | 7 | 4 | N    | Ap  | N+P |
| Poaceae         | <i>Puccinellia distans</i>                 |               | + |   | + | 8 | 6 | H    | Ap  | -   |
| Rosaceae        | <i>Pyrus communis</i>                      |               | + |   | + | 6 | 5 | M    | K   | N+P |
| Fagaceae        | <i>Quercus petraea</i>                     | +             | + |   | + | 6 | 5 | M    | Sp  | P   |
| Fagaceae        | <i>Quercus robur</i>                       | +             | + |   | + | 7 | x | M    | Sp  | P   |
| Fagaceae        | <i>Quercus petraea x robur</i>             | +             |   |   |   | 6 | 5 | M    | Sp  | P   |
| Fagaceae        | <i>Quercus rubra</i>                       |               | + |   |   | 7 | 5 | M    | K   | P   |
| Grossulariaceae | <i>Ribes rubrum</i>                        |               |   |   |   | 4 | 8 | N    | Ef  | N   |
| Fabaceae        | <i>Robinia pseudacacia</i>                 |               | + |   |   | 5 | 4 | M    | K   | N+P |
| Brassicaceae    | <i>Rorippa palustris</i>                   |               |   |   | + | 7 | 8 | T(H) | Ap  | -   |
| Rosaceae        | <i>Rosa canina</i>                         |               | + |   | + | 8 | 4 | N    | Ap  | P   |
| Rosaceae        | <i>Rubus caesius</i>                       | +             | + | + | + | 6 | x | NCh  | Ap  | N+P |
| Rosaceae        | <i>Rubus idaeus</i>                        | +             | + | + | + | 7 | x | N    | Sp  | N+P |
| Polygonaceae    | <i>Rumex acetosa</i>                       |               |   |   | + | 8 | x | H    | Ap  | P   |
| Polygonaceae    | <i>Rumex acetosella</i>                    |               | + | + | + | 8 | 3 | GH   | Ap  | P   |
| Polygonaceae    | <i>Rumex conglomeratus</i>                 |               |   |   | + | 8 | 7 | H    | Ap  | -   |
| Polygonaceae    | <i>Rumex obtusifolius</i>                  |               |   | + |   | 7 | 6 | H    | Ap  | -   |
| Polygonaceae    | <i>Rumex thyrsiflorus</i>                  | +             |   |   | + | 8 | 3 | H    | Ap  | -   |
| Salicaceae      | <i>Salix caprea</i>                        |               | + |   | + | 7 | 6 | NM   | Ap  | N+P |
| Salicaceae      | <i>Salix cinerea</i>                       |               |   |   | + | 7 | 9 | NM   | Sp  | N+P |
| Salicaceae      | <i>Salix purpurea</i>                      |               | + | + | + | 8 | x | NM   | Ap  | P   |
| Caprifoliaceae  | <i>Sambucus nigra</i>                      |               |   |   |   | 7 | 5 | NM   | Ap  | P   |
| Caryophyllaceae | <i>Scleranthus annuus</i>                  |               |   |   | + | 6 | 5 | T    | Ar  | -   |
| Caryophyllaceae | <i>Scleranthus perennis</i>                |               | + |   |   | 8 | 2 | H    | Sp  | -   |



| Family           | Species                         | Habitat types |   |   |   | L | F  | Lf | Ghg | Fp  |
|------------------|---------------------------------|---------------|---|---|---|---|----|----|-----|-----|
|                  |                                 | A             | B | C | D |   |    |    |     |     |
| Scrophulariaceae | <i>Scrophularia nodosa</i>      |               | + |   |   | 4 | 6  | H  | Sp  | N+P |
| Lamiaceae        | <i>Scutellaria galericulata</i> |               |   |   | + | 7 | 9  | H  | Sp  | N+P |
| Crassulaceae     | <i>Sedum acre</i>               |               |   | + | + | 8 | 2  | C  | Ap  | N+P |
| Asteraceae       | <i>Senecio jacobaea</i>         |               | + | + | + | 8 | 4  | H  | Ap  | N+P |
| Asteraceae       | <i>Senecio vernalis</i>         |               |   |   | + | 7 | 4  | TH | K   | -   |
| Asteraceae       | <i>Senecio viscosus</i>         |               |   |   | + | 8 | 3  | T  | Ar  | -   |
| Asteraceae       | <i>Senecio vulgaris</i>         |               | + |   | + | 7 | 5  | TH | Ar  | N+P |
| Poaceae          | <i>Setaria pumila</i>           |               |   |   | + | 7 | 4  | T  | Ar  | -   |
| Poaceae          | <i>Setaria viridis</i>          |               | + | + | + | 7 | 4  | T  | Ar  | -   |
| Caryophyllaceae  | <i>Silene vulgaris</i>          |               | + |   |   | 8 | 4  | HC | Ap  | N+P |
| Brassicaceae     | <i>Sisymbrium altissimum</i>    |               | + |   |   | 8 | 4  | TH | K   | -   |
| Brassicaceae     | <i>Sisymbrium officinale</i>    |               | + |   |   | 8 | 4  | T  | Ar  | -   |
| Solanaceae       | <i>Solanum nigrum</i>           |               |   |   | + | 7 | 5  | T  | Ar  | N+P |
| Asteraceae       | <i>Solidago canadensis</i>      |               |   |   | + | 8 | x  | HG | K   | N+P |
| Asteraceae       | <i>Solidago gigantea</i>        |               |   | + | + | 8 | 6  | HG | K   | N+P |
| Asteraceae       | <i>Solidago virga-aurea</i>     |               |   |   |   | 5 | 5  | H  | Sp  | N+P |
| Asteraceae       | <i>Sonchus oleraceus</i>        |               |   |   | + | 7 | 4  | TH | Ar  | N+P |
| Rosaceae         | <i>Sorbus aucuparia</i>         | +             | + |   | + | 6 | x  | M  | Sp  | N+P |
| Rosaceae         | <i>Sorbus intermedia</i>        | +             |   |   |   | 6 | x  | M  | K   | N+P |
| Caryophyllaceae  | <i>Spergula arvensis</i>        |               | + |   |   | 6 | 5  | T  | Ar  | -   |
| Lemnaceae        | <i>Spirodela polyrhiza</i>      |               |   | + | + | 7 | 11 | Hy | Sp  | -   |
| Lamiaceae        | <i>Stachys palustris</i>        |               |   |   | + | 7 | 7  | G  | Ap  | -   |
| Caryophyllaceae  | <i>Stellaria media</i>          |               |   | + | + | 6 | x  | T  | Ap  | N+P |
| Caprifoliaceae   | <i>Symphoricarpos albus</i>     | +             | + |   |   | 5 | 5  | N  | K   | N+P |
| Asteraceae       | <i>Tanacetum vulgare</i>        |               | + |   | + | 8 | 5  | H  | Ap  | N+P |
| Asteraceae       | <i>Taraxacum officinale</i>     |               | + | + | + | 7 | 5  | H  | Ap  | N+P |

| Family           | Species                            | Habitat types |   |   |   | L | F | Lf   | Ghg | Fp  |
|------------------|------------------------------------|---------------|---|---|---|---|---|------|-----|-----|
|                  |                                    | A             | B | C | D |   |   |      |     |     |
| Thelypteridaceae | <i>Thelypteris palustris</i>       |               |   |   | + | 5 | 8 | G    | Sp  | -   |
| Lamiaceae        | <i>Thymus pulegioides</i>          |               |   |   |   | 8 | 4 | Ch   | Sp  | N+P |
| Tiliaceae        | <i>Tilia cordata</i>               |               |   |   |   | 5 | 5 | M    | Sp  | N+P |
| Apiaceae         | <i>Torilis japonica</i>            |               | + |   | + | 6 | 5 | TH   | Ap  | N+P |
| Asteraceae       | <i>Tragopogon dubius</i>           |               |   |   |   | 8 | 4 | H    | Ar  | -   |
| Asteraceae       | <i>Tragopogon pratensis</i>        |               | + |   | + | 7 | 4 | H    | Ap  | N+P |
| Fabaceae         | <i>Trifolium arvense</i>           |               | + | + | + | 8 | 3 | T    | Ap  | N+P |
| Fabaceae         | <i>Trifolium dubium</i>            |               |   |   |   | 6 | 4 | T    | Ap  | N+P |
| Fabaceae         | <i>Trifolium hybridum</i>          |               |   |   | + | 7 | 6 | H    | Ap  | N+P |
| Fabaceae         | <i>Trifolium medium</i>            | +             | + |   | + | 7 | 4 | H    | Ap  | -   |
| Fabaceae         | <i>Trifolium repens</i>            |               |   |   | + | 8 | 5 | H    | Ap  | N+P |
| Asteraceae       | <i>Tussilago farfara</i>           |               |   |   | + | 8 | 6 | G(H) | Ap  | N+P |
| Ulmaceae         | <i>Ulmus minor</i>                 |               | + |   | + | 5 | x | M    | Sp  | -   |
| Urticaceae       | <i>Urtica dioica</i>               |               | + | + | + | x | 6 | H    | Ap  | -   |
| Ericaceae        | <i>Vaccinium myrtillus</i>         | +             |   |   |   | 5 | x | Ch   | Sp  | N+P |
| Ericaceae        | <i>Vaccinium vitis-idaea</i>       | +             |   |   |   | 5 | 4 | Ch   | Sp  | N+P |
| Scrophulariaceae | <i>Verbascum lychnitis</i>         |               | + |   |   | 7 | 3 | H    | Ap  | P   |
| Scrophulariaceae | <i>Verbascum phlomoides</i>        |               | + | + | + | 8 | 4 | H    | Ar  | P   |
| Scrophulariaceae | <i>Veronica anagallis-aquatica</i> |               |   | + | + | 7 | 9 | HHy  | Sp  | -   |
| Scrophulariaceae | <i>Veronica officinalis</i>        | +             | + | + | + | 6 | 4 | C    | Sp  | -   |
| Fabaceae         | <i>Vicia cracca</i>                |               | + |   | + | 7 | 6 | H    | Ap  | N+P |
| Fabaceae         | <i>Vicia sativa</i>                |               | + | + | + | 5 | x | T    | Ar  | -   |
| Fabaceae         | <i>Vicia tetrasperma</i>           |               |   |   | + | 6 | 5 | T    | Ar  | N+P |
| Violaceae        | <i>Viola arvensis</i>              |               |   | + | + | 6 | x | T    | Ar  | N+P |
| Violaceae        | <i>Viola canina</i>                | +             | + | + | + | 7 | 4 | H    | Sp  | -   |

| Family    | Species                      | Habitat types |   |   |   | L | F | Lf | Ghg | Fp |
|-----------|------------------------------|---------------|---|---|---|---|---|----|-----|----|
|           |                              | A             | B | C | D |   |   |    |     |    |
| Violaceae | <i>Viola reichenbachiana</i> |               | + |   | + | 4 | 5 | H  | Sp  | -  |

#### Explanations:

„ + ” - occurrence of the plant species at the study sites

**L- an intensity of light (according to Ellenberg's indicator numbers)**, the scale of requirements for plant species: 1- full shade plants, 2- intermediate between 1 and 3, 3- shade, usually less than 5 % full daylight, 4- intermediate between 3 and 5, 5- penumbra, exceptionally in full light, usually receiving less than 10 % full daylight, 6- intermediate between 5 and 7, 7- half-light, usually in full light, but also in the shade, receiving up to 30 % full daylight, 8- lights, only exceptionally at less than 40 % of full daylight, 9- full light, species of extremely light-demanding plants, receiving no less than 50 % of daylight, x- neutral species in relations to the indicator, „ - ” no data

**F- soil humidity (according to Ellenberg's indicator numbers)**, the range of requirements for plant species: 1- very dry soils, limited only to overdried localities, 2- intermediate between 1 and 3, 3- dry soils, more often on dry than fresh soils; they do not occur on wet, 4- intermediate between 3 and 5, 5- fresh soils, mainly moderately moist, not found in wet or dry places, 6- intermediate between 5 and 7, 7- moist soils; occur on wet, but not wet soils, 8- intermediate between 7 and 9, 9- wet, often soaked, heavy soils, 10- water level change indicators, water plants that can withstand a long time without flooding, 11- aquatic plants that have roots under water and leaves emerging above the water surface or floating on the surface, x- neutral species in relations to the indicator, „ - ” no data

**Lf- life forms:** C- non-woody chamaephytes, Ch- woody chamaephytes, G- geophytes, H- hemicryptophytes, Hy- hydrophytes; helophytes, L- lianas , M- megaphanerophytes, N- nanophanerophytes, T- therophytes, pPT- semi-parasites

**Ghg- geographical-historical groups:** Ap- apophytes, Ar- archaeophytes, Ef- ephemerophytes, K- kenophytes, Sp- non-synanthropic spontaneophytes

**Fp- food plants for bees:** N- nectariferous plants, P- polleniferous plants, " - „- no data
